## CORRECTION

# Correction: Analyzing and learning the language for different types of harassment

The *PLOS ONE* Staff

## Notice of republication

This article was republished on April 16, 2020, to correct errors in the Introduction and Acknowledgments introduced during the typesetting process. The publisher apologizes for these errors. Please download this article again to view the correct version.

## Reference

1. Rezvan M, Shekarpour S, Alshargi F, Thirunarayan K, Shalin VL, Sheth A (2020) Analyzing and learning the language for different types of harassment. *PLoS ONE* 15(3): e0227330. <https://doi.org/10.1371/journal.pone.0227330> PMID: 32218569

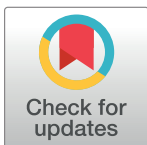

## OPEN ACCESS

**Citation:** The *PLOS ONE* Staff (2020) Correction: Analyzing and learning the language for different types of harassment. *PLoS ONE* 15(4): e0232650. <https://doi.org/10.1371/journal.pone.0232650>

**Published:** April 29, 2020

**Copyright:** © 2020 The PLOS ONE Staff. This is an open access article distributed under the terms of the [Creative Commons Attribution License](https://creativecommons.org/licenses/by/4.0/), which permits unrestricted use, distribution, and reproduction in any medium, provided the original author and source are credited.
